# Supplementary material for: Bioinspired heterostructured bead-on-string fibers via controlling the wet-assembly of nanoparticles
Source: Royal Society of Chemistry journal article supplement (doi:10.1039/c4cc05156d), 2014-07-21
Supplement: c4cc05156d2.pdf [file c4cc05156d2.pdf]

**Electronic Supplementary Information for**  
**Bioinspired heterostructured bead-on-string fibers via controlling wet-**  
**assembly of nanoparticles**

*Lin Zhao, Cheng Song, Miaoxin Zhang and Yongmei Zheng\*<sup>1</sup>*

**This ESI contains:**

Experimental Section

Supplementary Figures S1-S6

Supplementary Movie S1

---

<sup>1</sup>Key Laboratory of Bio-Inspired Smart Interfacial Science and Technology of Ministry of Education, School of Chemistry and Environment, Beihang University, Beijing, 100191 (P. R. China),

\* Correspondence and requests for materials should be addressed to Y. Z. (zhengym@buaa.edu.cn)

## Experimental Section

*Preparation of Materials:* This electrospinning setup (Micro & Nano Technology Expert in Shenzhen, China) was used to fabricate the fiber. Firstly, the polymer solution was prepared by using an injected fluid of a 5% (w/v) PMMA (poly-(methyl methacrylate),  $M_w = 300000$ ) solution in a solvent of N, N-dimethyl formamide (DMF) and then it was loaded into a 10 mL syringe, connecting a needle with its diameter of 0.9 mm by a poly-ethylene tube. The fluid was fed at a flow rate of  $1 \text{ mL h}^{-1}$ . An aluminum shelf (length×width×height of  $2.5 \text{ cm} \times 1 \text{ cm} \times 1 \text{ cm}$ ) was used to collect sample with the distance from the needle to the shelf of  $\sim 20 \text{ cm}$ . The voltage to make electrospinning fiber was set at 15kV. Secondly, the fog flow of hybrid nanoparticles can be made by the titanium tetrachloride ( $\text{TiCl}_4$ ) hydrolysis as follows:

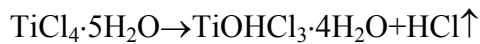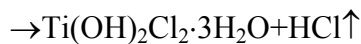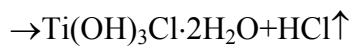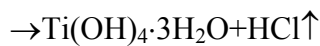

The different concentration fog flows were realized by using with different volumes (e.g., 0.2, 0.4, 0.6, 0.8, 1.0, 1.2, and 1.4 mL) of  $\text{TiCl}_4$ .

In addition, another pure nanoparticles as fog flow in control experiment were made by using  $\text{TiO}_2$  nanoparticles (P25, Degussa-Huls) or  $\text{ZnO}$  nanoparticles (diameter of  $\sim 100 \text{ nm}$ , Aladdin Industrial Corp.).

Thirdly, the electrospinning PMMA fiber was placed in the mist with above fog flows, e.g.,  $\text{Ti}(\text{OH})_n^+$  nanoparticles,  $\text{TiO}_2$  nanoparticles and  $\text{ZnO}$  nanoparticles. Thus nanoparticles-on-fibers with different densities were obtained for subsequent preparation of BHBFs.

*Wet-assembly of BHBF:* As for wet-assembly, relative humidity (RH) was controlled from 50% to 90% by Ultrasonic nebulizer NB-150U. The nanoparticles-on-fibers were placed

horizontally on holder in mist with fog flows in RH for a lasting wetting-period ranging from 2 s to 16 s. Subsequently, nanoparticles-on-fiber was assembled into nanoparticle-in-droplets-on-fiber during water condensation and water coalescence. After dried in ambient environment, “bead-on-string” structure was formed. By controlling the RH (from 60%, 65%, 70%, and 75% to 80%) and wetting times (from 6 s to 14 s), the volume and periodicity of bead-on-string were controlled easily. The multi-stage wet-assembly with repeated periods above was used to control the size of BHBFs. Thus excellent BHBFs were tailored successfully.

*Water collection efficiency:* Five kinds of BHBFs are placed horizontally in a vertical-down fog flow in a constant period. A scaling law of water droplet growth is used to estimate water collection efficiency  $\eta$ , i.e.,  $\eta = dV/dt = nSV_M$ , where  $dV$  is volume of droplet,  $dt$  is wetting time  $S$  is effective collection surface of the droplet,  $V_M$  is molar volume of liquid and  $n$  is the number of moles of liquid. In our experiment,  $\eta$  can be characterized with the water volume  $V_w$  at maximum within a given wetting time,  $\eta = V_w/t = 4/3\pi(r_w)^3/t$ , where  $r_w$  is the radius of droplet and  $t$  is the wetting time.

*Characterization:* Structures of BHBFs were observed by scanning electron microscope (SEM, Quanta FEG 250, FEI) at 10 kV. Characteristic element mapping analysis were collected using an X-Max Silicon Drift Detector (Oxford Instruments) EDS detector. The signals of Ti in the spectra were used for EDS chemical mapping. The water collection of fibers was observed by an OCAMicro40 contact angle meter system (Data-Physics, Germany) at ambient temperature, utilizing an ultrasonic nebulizer. Water drops with a threshold volume just as detached off BHBF was recorded by CCD camera of OCAMicro40 contact angle meter system. Curves were plotted by originPro8 software. The linear fitting and statistics error were obtained by analyst of OriginPro8.

## Supplementary Figures

Figure S1.

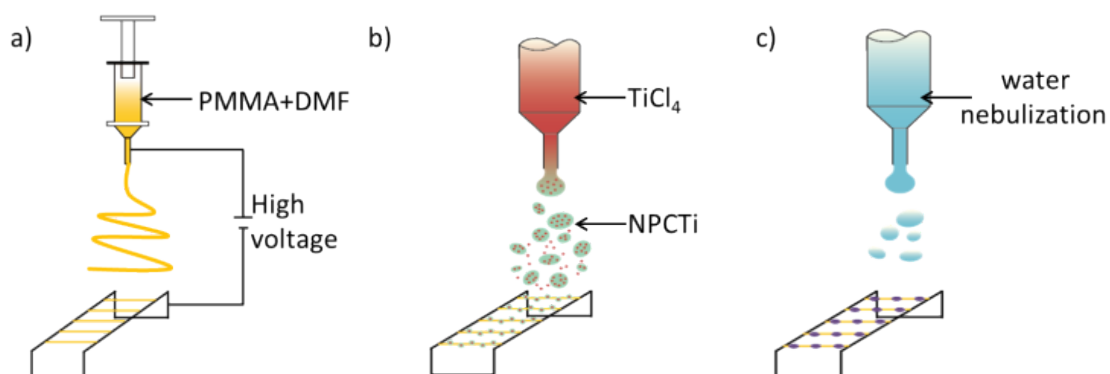

**Figure S1. Schematic set-up of fabricating electrospun BHBFs.** a) Schematic illustration of electrospun PMMA fibers. b) Schematic illustration of the hydrolysis of  $\text{TiCl}_4$ . Hydrolysis of  $\text{TiCl}_4$  is expected to be quite fast and NPCTi are formed as white smoke in the hood which are modified as dust and smoke in the environment. c) Schematic illustration of wetting test. Relative humidity is adjustable by vapor pressure at a given temperature. The distance between the jet and shelf is 5 cm, and by tuning water vapor speed and volume, different RH can be achieved.

**Figure S2.**

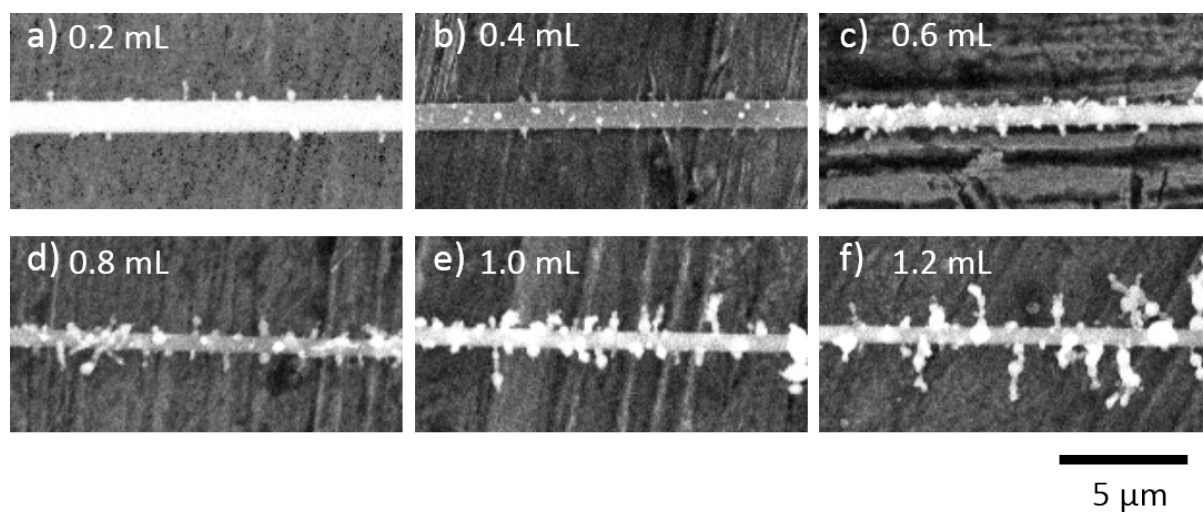

**Figure S2.** SEM images of nanoparticles on PMMA fibers via hydrolyzation of  $\text{TiCl}_4$ . Density of nanoparticle can be controlled by volumes from a) 0.2 mL, b) 0.4 mL, c) 0.6 mL, d) 0.8 mL, e) 1.0 mL to f) 1.2 mL of  $\text{TiCl}_4$  to be hydrolyzed. The dense nanoparticle-coated fibers favor effectively formation of BHBF with excellent "bead-on-string" structures.

**Figure S3.**

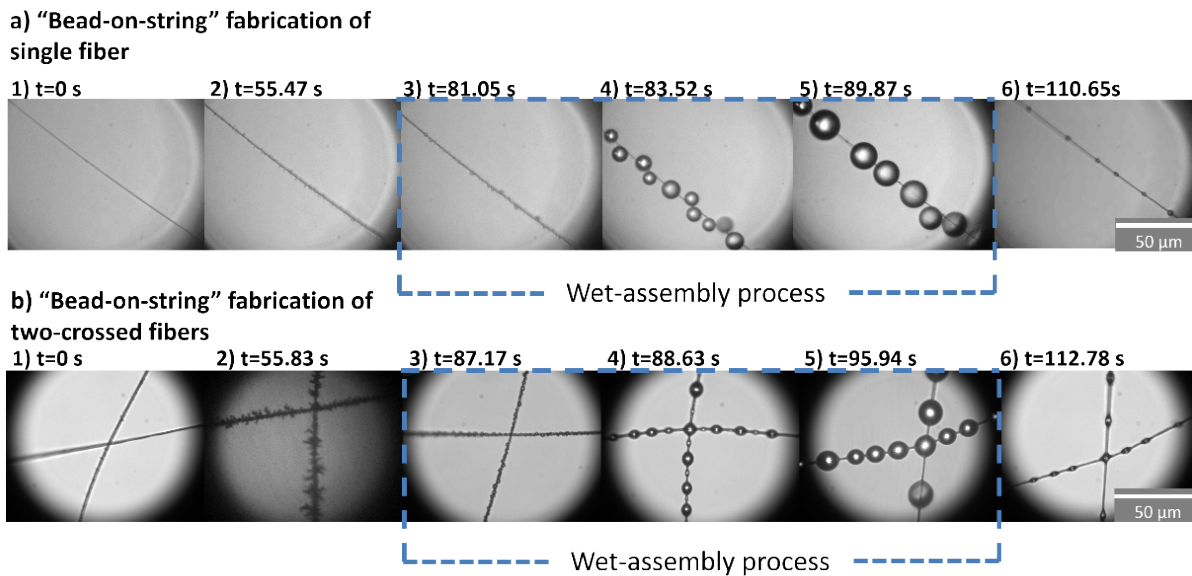

**Figure S3. In-situ observation of “bead-on-string” fabrication on single and two-crossed fibers** a) Observed on single fiber: 1) As-prepared electrospun PMMA single fiber is fabricated at  $\sim 0$  s. 2) Nanoparticles are adsorbed on fiber at  $\sim 55.47$  s. 3-5) Water condenses on PMMA-Ti fibers to form small droplets at  $\sim 81.05$  s and water droplets coalesces into bigger droplets from  $\sim 81.05$  s to  $\sim 89.87$  s in a wet-assembly process. 6) A single fiber with “bead-on-string” structure is fabricated after drying at  $\sim 110.65$  s. b) Observed on two-crossed fibers: 1) As-prepared electrospun PMMA contact fibers are fabricated at  $\sim 0$  s. 2) Nanoparticles are adsorbed on fibers at  $\sim 55.83$  s. 3-5) Water condenses on PMMA-Ti fibers to form small droplets at  $\sim 87.17$  s and water droplets coalesces into bigger droplets from  $\sim 88.63$  s to  $\sim 95.94$  s in a wet-assembly process. 6) Contact fibers with “bead-on-string” structure are fabricated after drying at  $\sim 112.78$  s. Images above illustrate the two-crossed electrospun fibers which exhibit correlate data compared with single fibers. RH of 70% and wetting time of 8 s is kept during wet-assembly.

**Figure S4**

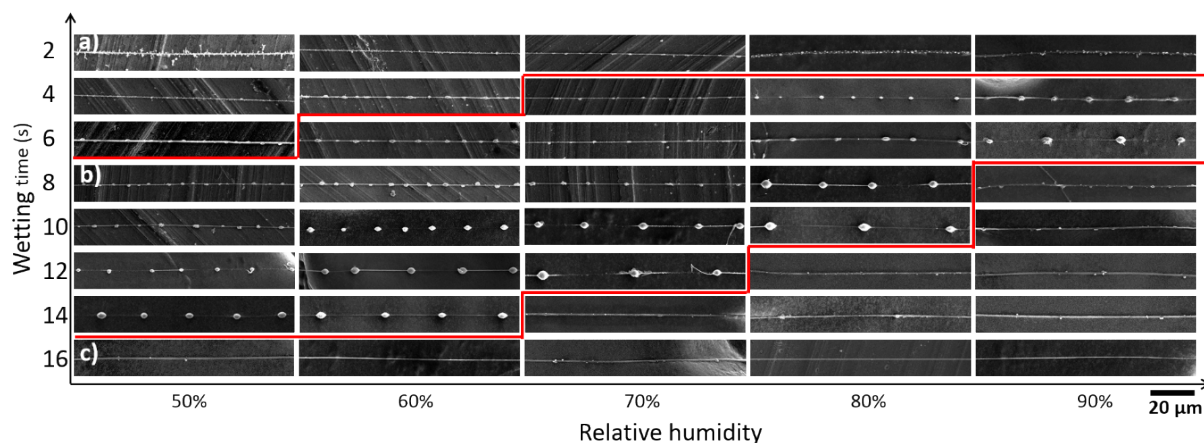

**Figure S4. SEM images of “bead-on-string” structure at different conditions (humidity and wetting period) in single adsorption-wetting-drying process.** The relative humidity increased from 50%, 60%, 70%, 80% to 90% versus wetting time 2 s, 4 s, 6 s, 8 s, 10 s, 12 s, 14 s and 16 s. In the images of a), where the humidity is too low or the wetting time is too short to form BHBF, nanoparticles are still scattered along fiber. In the images of c), where the humidity is too high or the wetting time is too long to form BHBF, no obvious “bead-on-string” structure appears on the fiber. The reason could be that during the droplet condensation process in a higher humid or longer wetting time, larger droplets containing nanoparticles may drop off fiber and little nanoparticles remain. In the images of b), where the wetting time and humidity are optimized, “bead-on-string” structure forms successfully.

Figure S5

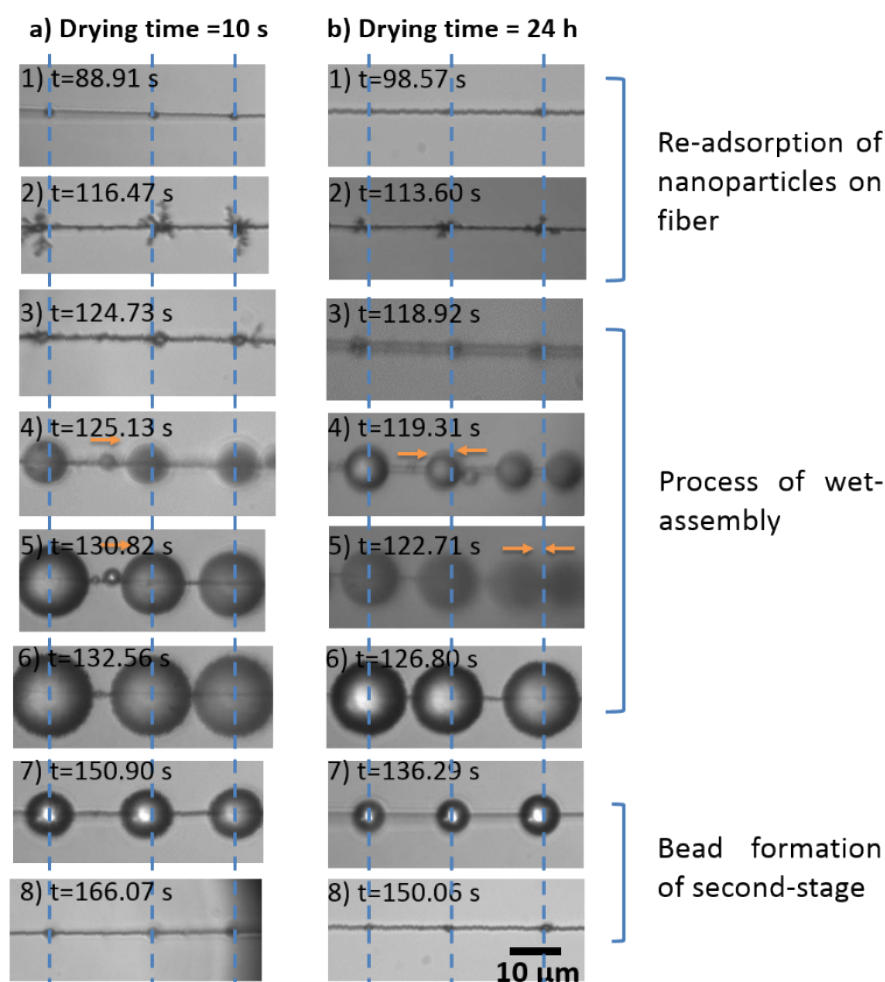

**Figure S5** Optical images of second-stage adsorption-wetting-drying process on fiber via different drying times. **a) The case on fiber with beads in drying time of 10 s.** 1) Optical image is obtained after drying 10 s. 2) Nanoparticles are adsorbed at the water-air interface at  $\sim 116.47$  s. 3-6) Water condenses and coalesces around bead from  $\sim 124.73$  s to  $\sim 132.56$  s. 7-8) There appears bead-on-string structure after water-evaporation at  $\sim 166.07$  s. **b) The case on fiber with beads in drying time of 24 h.** 1) Optical image is obtained after drying 24 h. 2) Nanoparticles are adsorbed at the water-air interface at  $\sim 113.60$  s. 3-6) Water condenses and coalesces around bead from  $\sim 118.92$  s to  $\sim 126.80$  s. 7-8) There appears bead-on-string structure after water-evaporation at 150.06 s. The hydrophilicity of NPCTi will accelerate wet-assembly due to the energy gradient arisen from a difference of  $T_i$  between “bead” and “string”. It is supposed that the adsorption of nanoparticles on the water-air interface would act a significant and synergistic role during the wet-assembly. RH of 65% and wetting time of 8 s is kept during wet-assembly.



**Figure S6.**

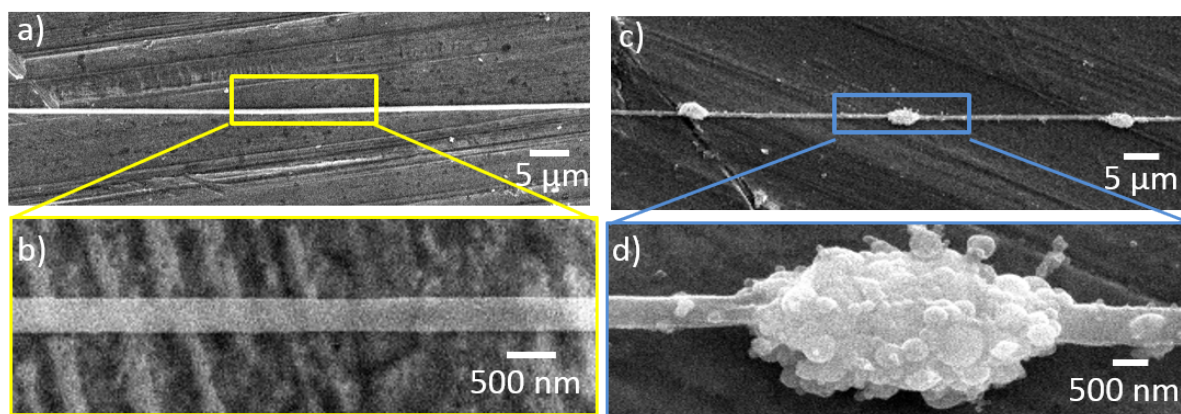

**Figure S6. SEM images of bare PMMA fiber dealt by wetting for 10 s at the RH of 70%.**

a) SEM image of bare PMMA fiber after wetting. b) Magnified SEM image of bare PMMA fiber after wetting. c) SEM image of BHBf dealt by wetting for 10 s at the RH of 70%. d) Magnified SEM image of BHBf after wetting.

**Figure S7.**

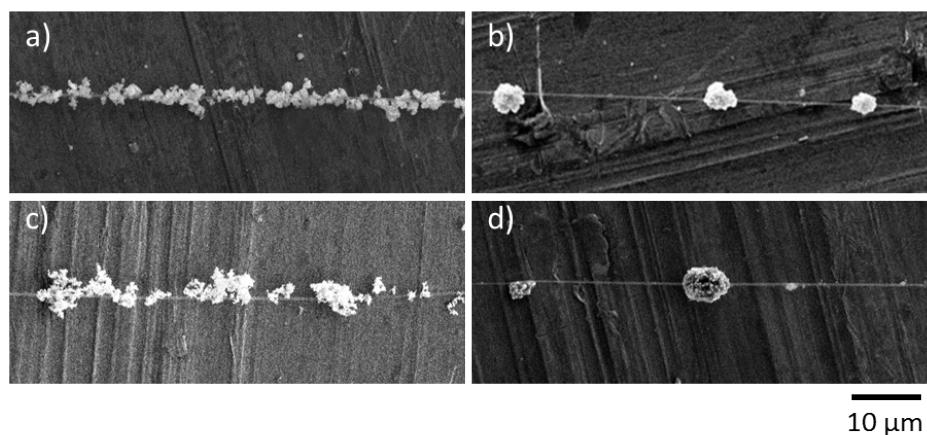

**Figure S7. SEM images of bead-on-string formation via wet-assembly of  $\text{TiO}_2$  and  $\text{ZnO}$  nanoparticles.** Fog flows of  $\text{TiO}_2$  (0.5 g) and  $\text{ZnO}$  nanoparticles (0.5 g) are made by blowing  $\text{N}_2$  gas. Wet-assembly is under humidity of 70% for 10 s. The uniform fiber is PMMA electrospinning fiber. a) Nanoparticle  $\text{TiO}_2$  is adsorbed on PMMA fiber. b) Bead-on-string is formed via wet-assembly during water condensation and coalescence. Bead is composed of nanoparticle  $\text{TiO}_2$ . c) Nanoparticle  $\text{ZnO}$  is adsorbed on PMMA fiber. d) Bead-on-string is formed via wet-assembly during water condensation and coalescence. Bead is composed of nanoparticle  $\text{ZnO}$ .

## **Supplementary Movie**

Movie S1: The dynamic process of multi-stage wet-assembly for BHBF.
